# Supplementary material for: A Multilevel Study of Eupatorin and Scutellarein as Anti-Amyloid Agents in Alzheimer’s Disease
Source: MDPI journal article supplement (doi:10.3390/biomedicines11051357), 2023-05-04
Supplement: s1 [file s1]

# A Multilevel Study of Eupatorin and Scutellarein as Anti-Amyloid Agents in Alzheimer's Disease

Aikaterini E. I. Rizou, Georgia I. Nasi, Yiorgos Paikopoulos, Dimitra S. Bezantakou, Konstantina D. Vrila, Panagiotis M. Spatharas, Virginia Dimaki, Nikos C. Papandreou, Fotini N. Lamari, Niki Chondrogianni and Vassiliki A. Iconomidou

**Table S1.** Prediction of physicochemical properties, pharmacokinetics and druglikeness of eupatorin and scutellarein using SwissADME.

| Properties                                       | Eupatorin                                                                          | Scutellarein                                                                        |
|--------------------------------------------------|------------------------------------------------------------------------------------|-------------------------------------------------------------------------------------|
| Structure                                        | 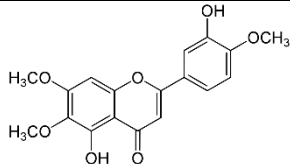 |  |
| <b>Physicochemical Properties</b>                |                                                                                    |                                                                                     |
| Molecular Formula                                | C <sub>18</sub> H <sub>16</sub> O <sub>7</sub>                                     | C <sub>15</sub> H <sub>10</sub> O <sub>6</sub>                                      |
| Molecular Weight (g/mol)                         | 344.32                                                                             | 286.24                                                                              |
| Number of rotatable bonds                        | 4                                                                                  | 1                                                                                   |
| Number of heavy atoms                            | 25                                                                                 | 21                                                                                  |
| Number of aromatic heavy atoms                   | 16                                                                                 | 16                                                                                  |
| Fraction Csp <sup>3</sup>                        | 0.17                                                                               | 0                                                                                   |
| Number of H-bond acceptors                       | 7                                                                                  | 6                                                                                   |
| Number of H-bond donors                          | 2                                                                                  | 4                                                                                   |
| Topological Polar Surface Area (Å <sup>2</sup> ) | 98.36                                                                              | 111.13                                                                              |
| <b>Lipophilicity</b>                             |                                                                                    |                                                                                     |
| Log P <sub>o/w</sub>                             | 2.53                                                                               | 1.81                                                                                |
| Water solubility                                 | Moderately soluble                                                                 | Soluble                                                                             |
| <b>Pharmacokinetics</b>                          |                                                                                    |                                                                                     |
| Gastrointestinal absorption                      | High                                                                               | High                                                                                |
| Blood-Brain barrier                              | No                                                                                 | No                                                                                  |
| P-glycoprotein substrate                         | No                                                                                 | No                                                                                  |
| CYP1A2 inhibitor                                 | Yes                                                                                | Yes                                                                                 |
| CYP2C19 inhibitor                                | No                                                                                 | No                                                                                  |
| CYP2C9 inhibitor                                 | Yes                                                                                | No                                                                                  |
| CYP2D6 inhibitor                                 | Yes                                                                                | Yes                                                                                 |
| CYP3A4 inhibitor                                 | Yes                                                                                | Yes                                                                                 |
| Log K <sub>p</sub> (skin permeation) (cm/s)      | -5.99                                                                              | -6.16                                                                               |
| <b>Druglikeness</b>                              |                                                                                    |                                                                                     |
| Lipinski                                         | Yes; 0 violation                                                                   | Yes; 0 violation                                                                    |
| Ghose                                            | Yes                                                                                | Yes                                                                                 |
| Veber                                            | Yes                                                                                | Yes                                                                                 |
| Egan                                             | Yes                                                                                | Yes                                                                                 |

|                            |      |      |
|----------------------------|------|------|
| Muegge                     | Yes  | Yes  |
| Bioavailability Score      | 0.55 | 0.55 |
| <b>Medicinal Chemistry</b> |      |      |
| Leadlikeness               | Yes  | Yes  |
| Synthetic accessibility    | 3.43 | 3.04 |

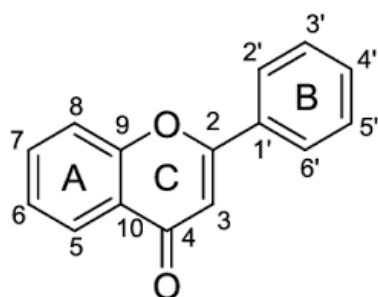

**Figure S1.** The flavone numbering.

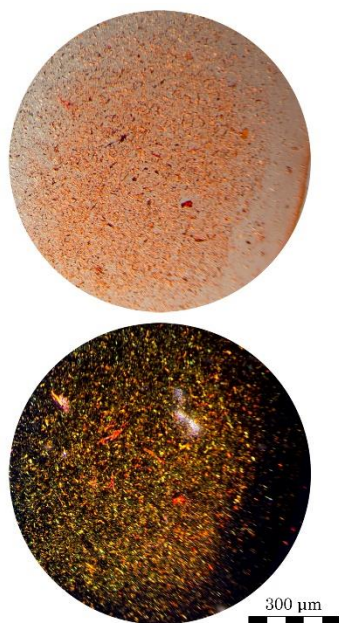

**Figure S2.** Photomicrographs of Congo Red-stained gels derived from the incubation of A $\beta$ <sub>42</sub> peptide as control. The Congo Red dye is bound, as seen under bright field illumination (up). Apple-green birefringence was observed under crossed polars (down).

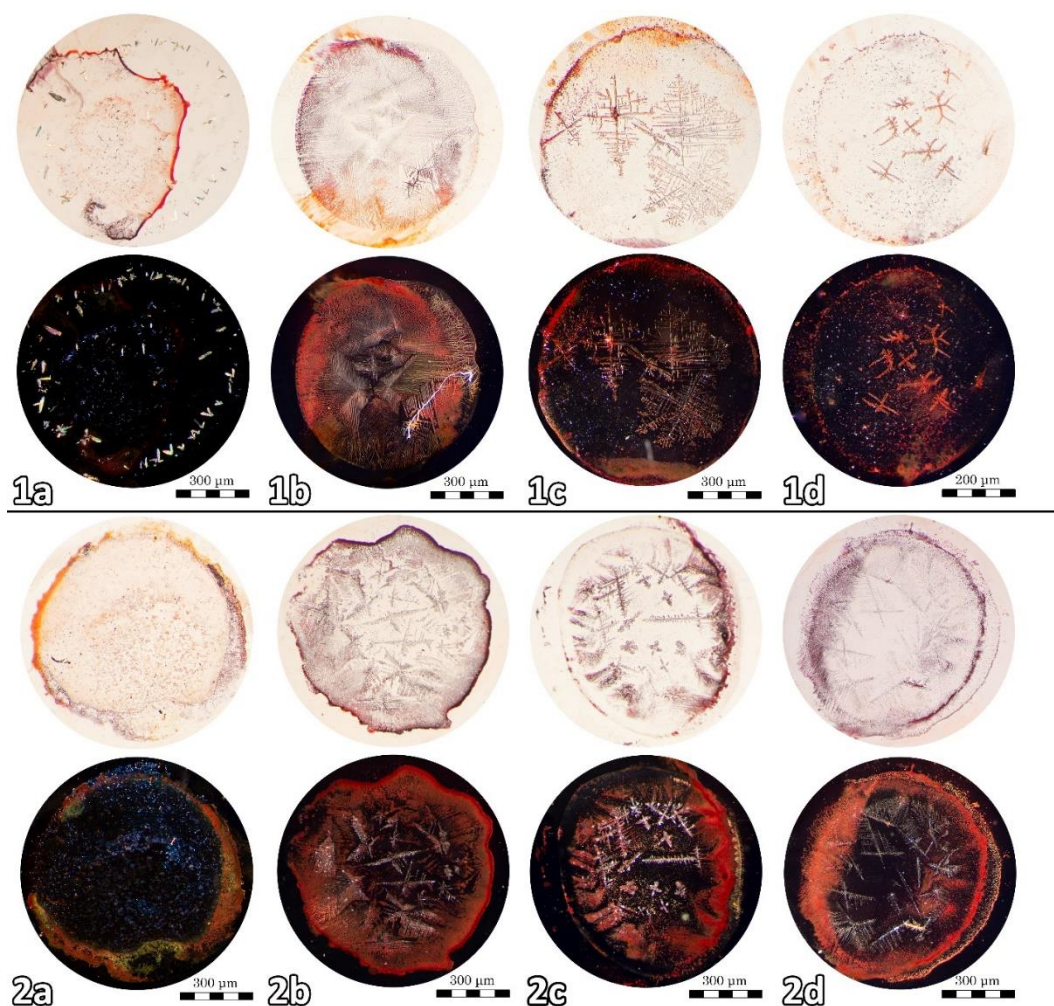

**Figure S3.** Photomicrographs of Congo Red-stained gels derived from the co-incubation of A $\beta$ <sub>42</sub> peptide in three ratios with the natural products, eupatorin (1:1(1b), 1:5(1c), 1:10(1d)), scutellarein (1:1(2b), 1:5(2c), 1:10(2d)). The natural products were stained separately to control that there was no birefringence (1a, 2a). The Congo Red dye is bound, as seen under bright field illumination (upper). No apple-green birefringence was observed under crossed polars in any concentration.
